# Supplementary material for: Pseudomonas aeruginosa clinical blood isolates display significant phenotypic variability
Source: PubMed Central journal article supplement (PMC9258867; doi:10.1371/journal.pone.0270576), 2022-07-06

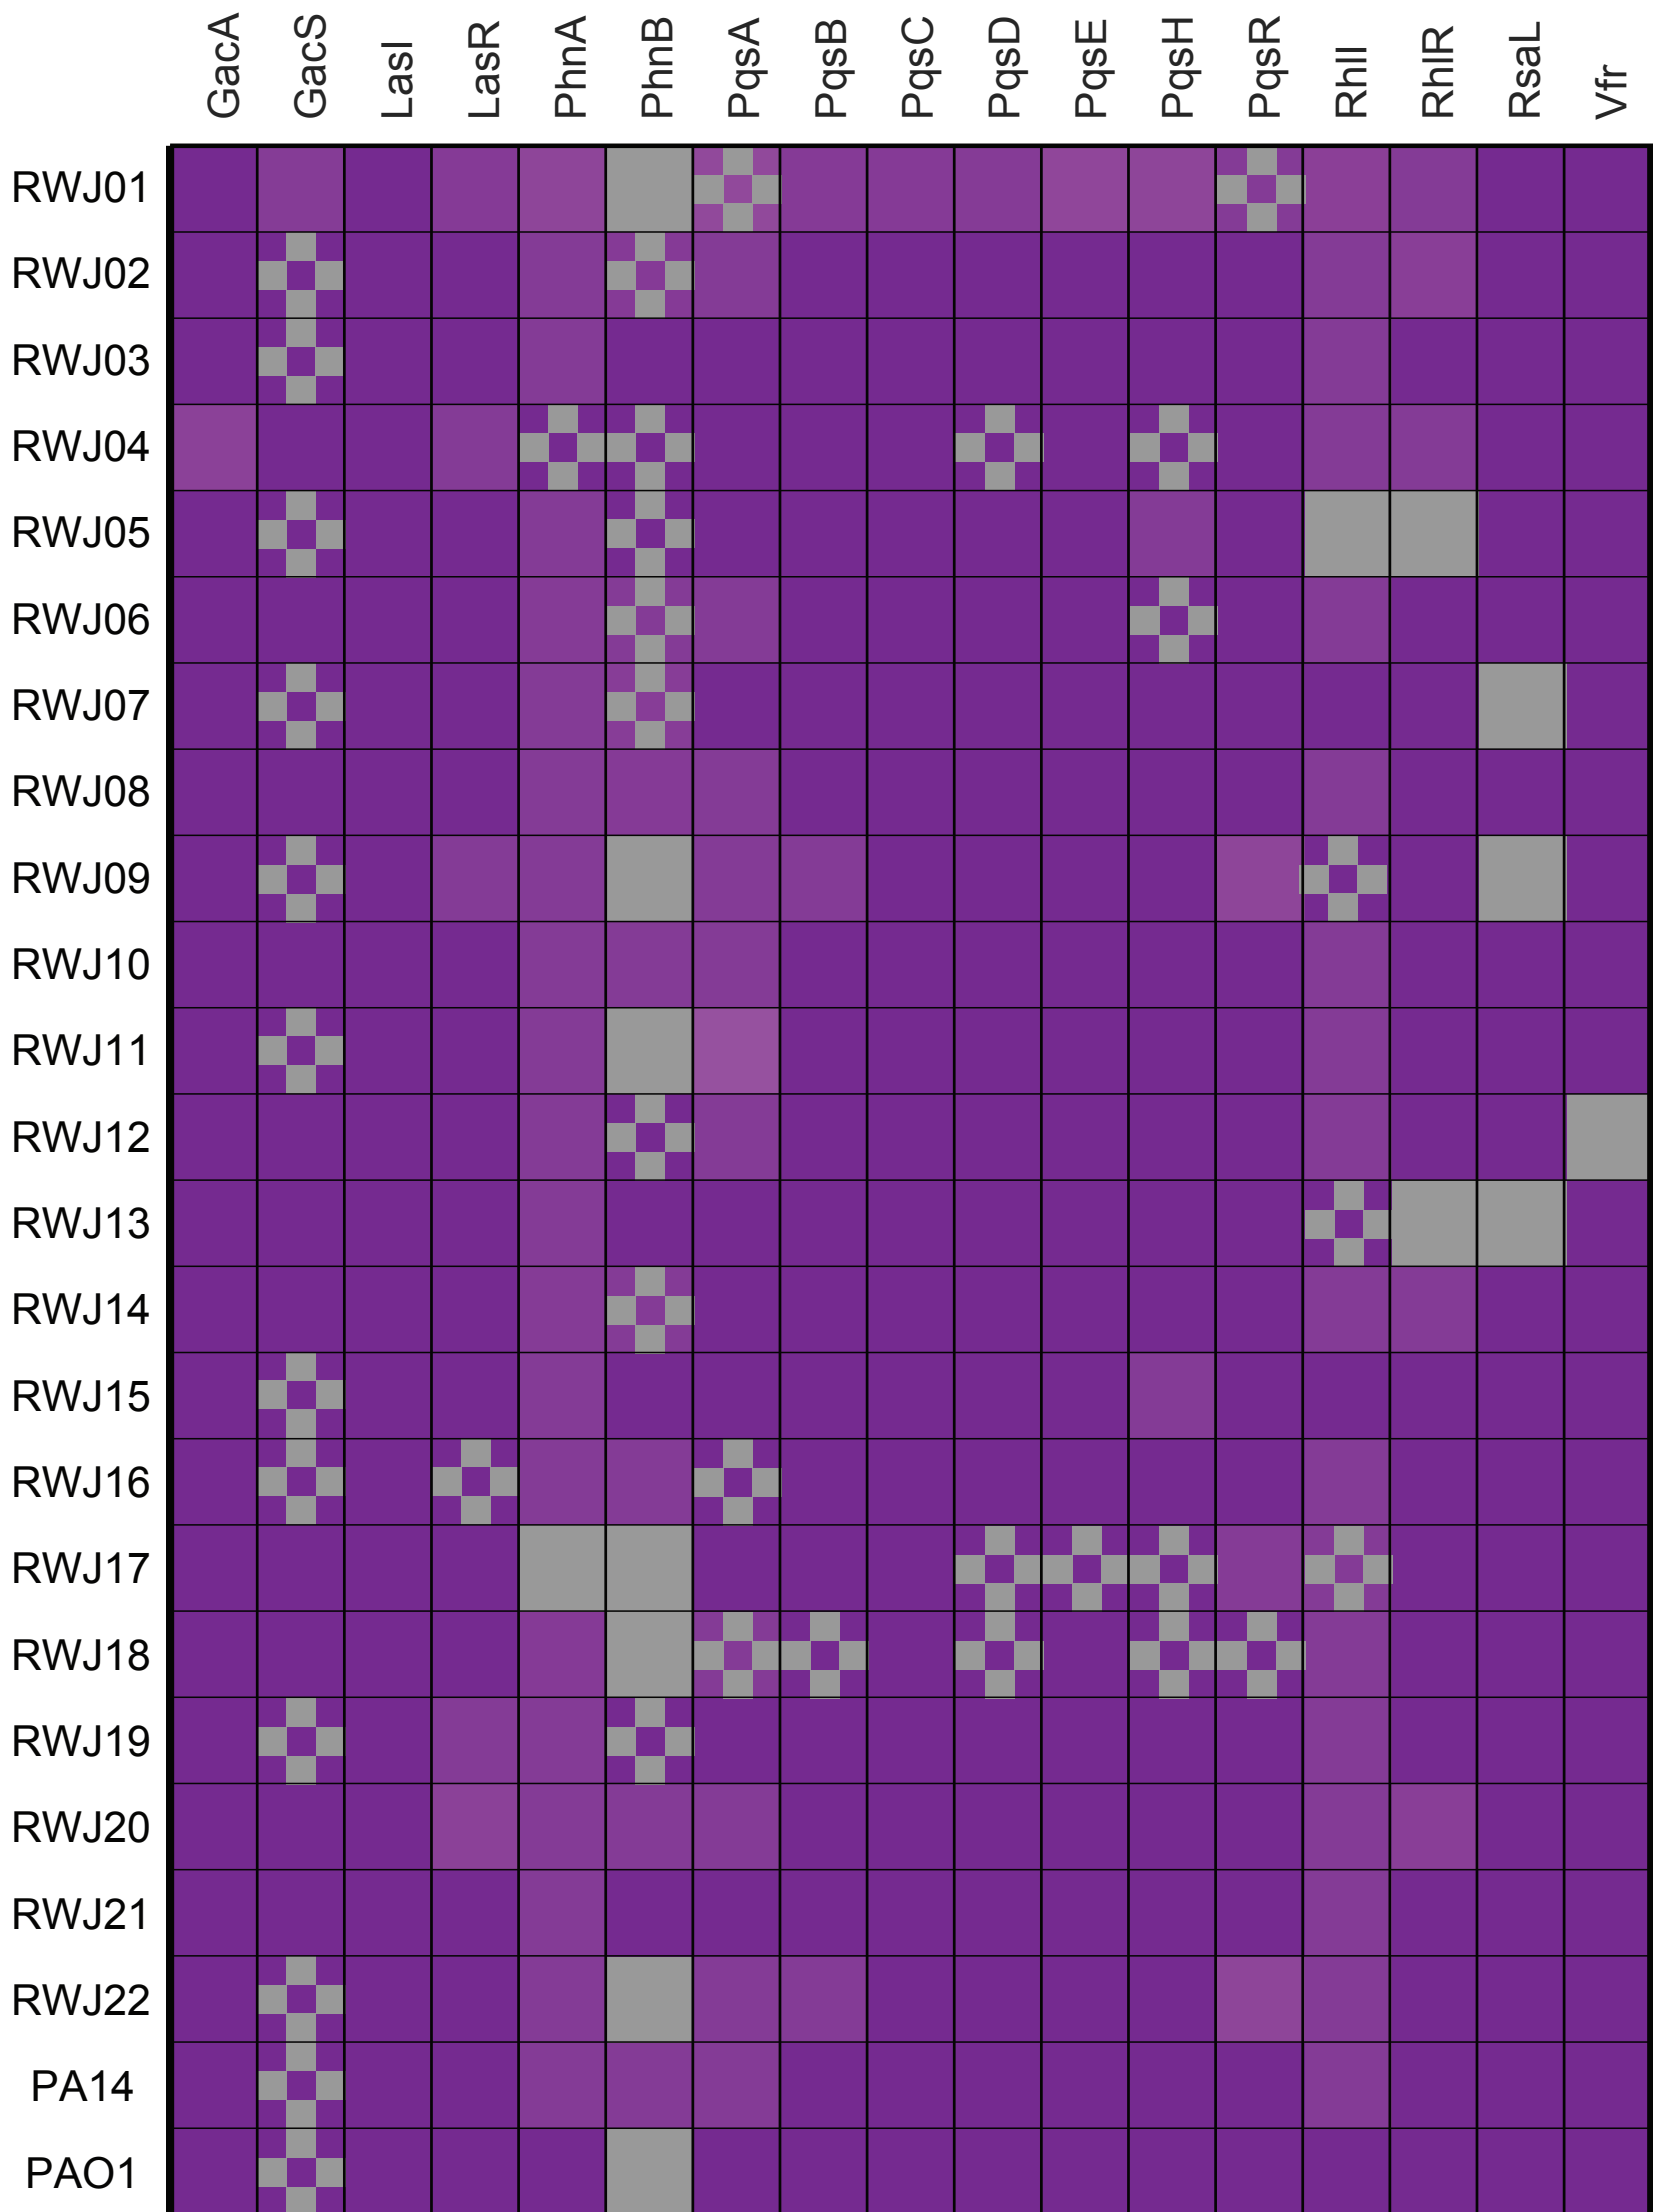

Protein Similarity Score

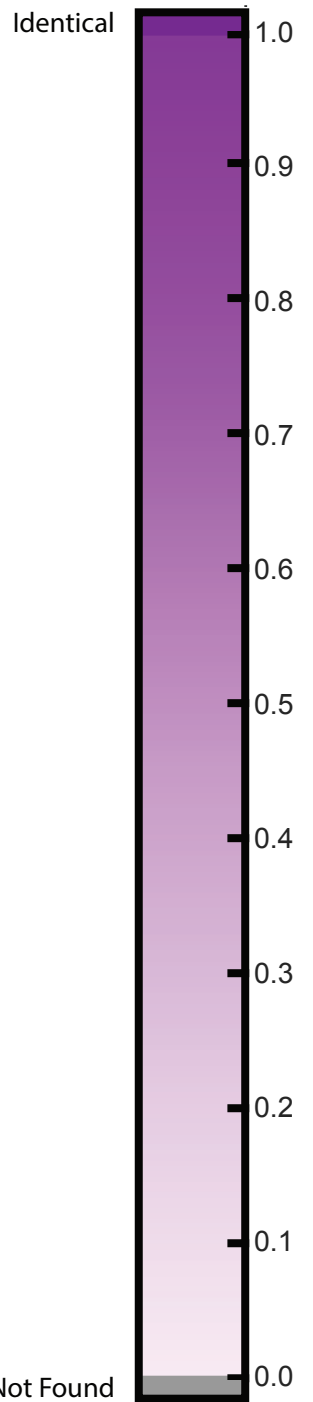

Supplement: pone.0270576.s002.pdf [file pone.0270576.s002.pdf]
