# Supplementary material for: Pseudomonas aeruginosa clinical blood isolates display significant phenotypic variability
Source: PubMed Central journal article supplement (PMC9258867; doi:10.1371/journal.pone.0270576), 2022-07-06
Supplement: pone.0270576.s003.pdf [file pone.0270576.s003.pdf]

**S1 Table. Assembly Statistics.**

| <b>Assembly</b>                      | <b>RWJPA_01</b> | <b>RWJPA_02</b> | <b>RWJPA_03</b> | <b>RWJPA_04</b> | <b>RWJPA_05</b> |
|--------------------------------------|-----------------|-----------------|-----------------|-----------------|-----------------|
| <b>Accession ID</b>                  | JAIFHX000000000 | JAIFHW000000000 | JAIFHV000000000 | JAIFHU000000000 | JAMKOP000000000 |
| <b># contigs (&gt;= 0 bp)</b>        | 847             | 1127            | 921             | 1189            | 1010            |
| <b># contigs (&gt;= 1000 bp)</b>     | 829             | 1101            | 886             | 1157            | 910             |
| <b># contigs (&gt;= 5000 bp)</b>     | 307             | 314             | 339             | 317             | 364             |
| <b># contigs (&gt;= 10000 bp)</b>    | 118             | 102             | 141             | 99              | 141             |
| <b># contigs (&gt;= 25000 bp)</b>    | 21              | 11              | 17              | 10              | 22              |
| <b># contigs (&gt;= 50000 bp)</b>    | 2               | 3               | 2               | 0               | 2               |
| <b>Total length (&gt;= 0 bp)</b>     | 4852386         | 5245956         | 5447710         | 5229446         | 5627158         |
| <b>Total length (&gt;= 1000 bp)</b>  | 4845663         | 5231930         | 5432350         | 5211636         | 5571005         |
| <b>Total length (&gt;= 5000 bp)</b>  | 3407734         | 3233826         | 4009574         | 3124051         | 4142393         |
| <b>Total length (&gt;= 10000 bp)</b> | 2100689         | 1795389         | 2614319         | 1614028         | 2593175         |
| <b>Total length (&gt;= 25000 bp)</b> | 762570          | 463987          | 671092          | 334790          | 869438          |
| <b>Total length (&gt;= 50000 bp)</b> | 112379          | 200839          | 127448          | 0               | 152390          |
| <b># contigs</b>                     | 832             | 1115            | 897             | 1173            | 966             |
| <b>Largest contig</b>                | 57435           | 95527           | 71860           | 45222           | 100172          |
| <b>Total length</b>                  | 4847444         | 5242454         | 5439850         | 5224058         | 5612202         |
| <b>GC (%)</b>                        | 65.32           | 64.77           | 65.39           | 64.83           | 65.06           |
| <b>N50</b>                           | 8309            | 6539            | 9183            | 6361            | 9061            |
| <b>N75</b>                           | 4405            | 3497            | 4845            | 3392            | 4773            |
| <b>L50</b>                           | 154             | 207             | 152             | 227             | 164             |
| <b>L75</b>                           | 356             | 482             | 354             | 511             | 378             |
| <b># N's per 100 kbp</b>             | 0               | 0               | 0               | 0               | 0               |

| Assembly                   | RWJPA_06        | RWJPA_07        | RWJPA_08        | RWJPA_09        | RWJPA_10        |
|----------------------------|-----------------|-----------------|-----------------|-----------------|-----------------|
| Accession ID               | JAIFHT000000000 | JAIFHS000000000 | JAMKOO000000000 | JAIFHR000000000 | JAIFHQ000000000 |
| # contigs (>= 0 bp)        | 1023            | 1011            | 844             | 1421            | 1110            |
| # contigs (>= 1000 bp)     | 946             | 951             | 805             | 1060            | 1073            |
| # contigs (>= 5000 bp)     | 267             | 366             | 360             | 396             | 349             |
| # contigs (>= 10000 bp)    | 91              | 152             | 150             | 148             | 107             |
| # contigs (>= 25000 bp)    | 14              | 17              | 26              | 19              | 16              |
| # contigs (>= 50000 bp)    | 2               | 0               | 1               | 0               | 1               |
| Total length (>= 0 bp)     | 4678422         | 5619041         | 5473816         | 6104119         | 5443440         |
| Total length (>= 1000 bp)  | 4640073         | 5586492         | 5453835         | 5944124         | 5424757         |
| Total length (>= 5000 bp)  | 2880838         | 4017972         | 4251126         | 4292105         | 3587849         |
| Total length (>= 10000 bp) | 1629301         | 2548279         | 2759072         | 2508639         | 1889845         |
| Total length (>= 25000 bp) | 550028          | 573171          | 940833          | 661156          | 565430          |
| Total length (>= 50000 bp) | 175015          | 0               | 75733           | 0               | 51535           |
| # contigs                  | 978             | 983             | 821             | 1166            | 1087            |
| Largest contig             | 109639          | 43214           | 75733           | 49712           | 51535           |
| Total length               | 4663337         | 5609493         | 5465488         | 6017238         | 5435878         |
| GC (%)                     | 64.4            | 65.05           | 65.18           | 64.57           | 64.98           |
| N50                        | 6956            | 8775            | 10116           | 8536            | 7226            |
| N75                        | 3645            | 4503            | 5460            | 4379            | 3929            |
| L50                        | 175             | 180             | 148             | 203             | 206             |
| L75                        | 412             | 406             | 331             | 444             | 460             |
| # N's per 100 kbp          | 0               | 0               | 0               | 0               | 0               |

| Assembly                   | RWJPA_11        | RWJPA_12        | RWJPA_13        | RWJPA_14        | RWJPA_15        |
|----------------------------|-----------------|-----------------|-----------------|-----------------|-----------------|
| Accession ID               | JAIFHP000000000 | JAIFHO000000000 | JAIFHN000000000 | JAIFHM000000000 | JAIFHL000000000 |
| # contigs (>= 0 bp)        | 892             | 935             | 867             | 982             | 670             |
| # contigs (>= 1000 bp)     | 865             | 909             | 829             | 929             | 648             |
| # contigs (>= 5000 bp)     | 337             | 327             | 340             | 380             | 355             |
| # contigs (>= 10000 bp)    | 146             | 130             | 128             | 145             | 151             |
| # contigs (>= 25000 bp)    | 25              | 25              | 17              | 17              | 39              |
| # contigs (>= 50000 bp)    | 4               | 2               | 1               | 2               | 11              |
| Total length (>= 0 bp)     | 5513513         | 5371574         | 5042057         | 5737848         | 5530957         |
| Total length (>= 1000 bp)  | 5498281         | 5355406         | 5023000         | 5712543         | 5521555         |
| Total length (>= 5000 bp)  | 4096195         | 3816721         | 3703291         | 4239530         | 4683297         |
| Total length (>= 10000 bp) | 2755217         | 2428798         | 2198455         | 2550047         | 3229387         |
| Total length (>= 25000 bp) | 959343          | 902431          | 604852          | 628135          | 1500669         |
| Total length (>= 50000 bp) | 237391          | 118852          | 52085           | 125375          | 597102          |
| # contigs                  | 880             | 925             | 845             | 950             | 656             |
| Largest contig             | 66830           | 62726           | 52085           | 73421           | 62953           |
| Total length               | 5509452         | 5367750         | 5035183         | 5727792         | 5526810         |
| GC (%)                     | 65.21           | 64.53           | 65.26           | 65.14           | 64.74           |
| N50                        | 10096           | 8689            | 8758            | 9076            | 13488           |
| N75                        | 4915            | 4492            | 4882            | 4865            | 6775            |
| L50                        | 146             | 158             | 163             | 179             | 112             |
| L75                        | 345             | 372             | 355             | 392             | 264             |
| # N's per 100 kbp          | 0               | 0               | 0               | 0               | 0               |

| Assembly                   | RWJPA_16        | RWJPA_17        | RWJPA_18        | RWJPA_19        | RWJPA_20        |
|----------------------------|-----------------|-----------------|-----------------|-----------------|-----------------|
| Accession ID               | JAIFHK000000000 | JAMKOM000000000 | JAMKON000000000 | JAIFHJ000000000 | JAIFHI000000000 |
| # contigs (>= 0 bp)        | 673             | 1062            | 1203            | 958             | 966             |
| # contigs (>= 1000 bp)     | 634             | 1062            | 1197            | 860             | 923             |
| # contigs (>= 5000 bp)     | 382             | 140             | 198             | 373             | 360             |
| # contigs (>= 10000 bp)    | 198             | 40              | 52              | 165             | 134             |
| # contigs (>= 25000 bp)    | 48              | 7               | 7               | 21              | 22              |
| # contigs (>= 50000 bp)    | 7               | 0               | 0               | 1               | 4               |
| Total length (>= 0 bp)     | 6200164         | 3406309         | 4090970         | 5706942         | 5612846         |
| Total length (>= 1000 bp)  | 6182263         | 3406309         | 4087789         | 5655797         | 5588878         |
| Total length (>= 5000 bp)  | 5480934         | 1401816         | 1838827         | 4371530         | 4058536         |
| Total length (>= 10000 bp) | 4119577         | 717302          | 845068          | 2895414         | 2462214         |
| Total length (>= 25000 bp) | 1844529         | 249843          | 221521          | 733272          | 840069          |
| Total length (>= 50000 bp) | 463968          | 0               | 0               | 54103           | 252654          |
| # contigs                  | 650             | 1062            | 1201            | 910             | 948             |
| Largest contig             | 85592           | 47909           | 43579           | 54103           | 86779           |
| Total length               | 6192975         | 3406309         | 4090468         | 5690456         | 5607061         |
| GC (%)                     | 65.82           | 63.26           | 64.4            | 65.49           | 65.1            |
| N50                        | 15301           | 3992            | 4276            | 10113           | 8461            |
| N75                        | 8165            | 2202            | 2376            | 5438            | 4685            |
| L50                        | 114             | 208             | 243             | 161             | 172             |
| L75                        | 256             | 499             | 565             | 354             | 391             |
| # N's per 100 kbp          | 0               | 0               | 0               | 0               | 0               |

| Assembly                   | RWJPA_21        | RWJPA_22        | PA14    | PAO1    |
|----------------------------|-----------------|-----------------|---------|---------|
| Accession ID               | JAIFHH000000000 | JAIFHG000000000 |         |         |
| # contigs (>= 0 bp)        | 773             | 1095            | 841     | 1034    |
| # contigs (>= 1000 bp)     | 744             | 1052            | 810     | 1020    |
| # contigs (>= 5000 bp)     | 391             | 345             | 330     | 320     |
| # contigs (>= 10000 bp)    | 172             | 114             | 140     | 104     |
| # contigs (>= 25000 bp)    | 34              | 17              | 31      | 16      |
| # contigs (>= 50000 bp)    | 5               | 1               | 3       | 3       |
| Total length (>= 0 bp)     | 5803095         | 5441034         | 5531541 | 5167927 |
| Total length (>= 1000 bp)  | 5788513         | 5423344         | 5516999 | 5161868 |
| Total length (>= 5000 bp)  | 4857808         | 3592943         | 4223709 | 3406819 |
| Total length (>= 10000 bp) | 3298351         | 1995401         | 2872587 | 1905889 |
| Total length (>= 25000 bp) | 1286272         | 572392          | 1217268 | 629604  |
| Total length (>= 50000 bp) | 302790          | 60477           | 248864  | 158095  |
| # contigs                  | 757             | 1061            | 818     | 1025    |
| Largest contig             | 69356           | 60477           | 97669   | 55294   |
| Total length               | 5797699         | 5429815         | 5523386 | 5165173 |
| GC (%)                     | 65.56           | 65.05           | 65.51   | 65.6    |
| N50                        | 11604           | 7299            | 10834   | 7436    |
| N75                        | 6568            | 3881            | 5268    | 3804    |
| L50                        | 135             | 200             | 130     | 184     |
| L75                        | 302             | 454             | 315     | 428     |
| # N's per 100 kbp          | 0               | 0               | 0       | 0       |
