# Supplementary material for: Pseudomonas aeruginosa clinical blood isolates display significant phenotypic variability
Source: PubMed Central journal article supplement (PMC9258867; doi:10.1371/journal.pone.0270576), 2022-07-06
Supplement: pone.0270576.s004.pdf [file pone.0270576.s004.pdf]

**S2 Table. Genes of Interest, their PAO1 reference name, and their associated biological activity category.**

| gene name | PAO1 reference number | biological activity category |
|-----------|-----------------------|------------------------------|
| alg44     | PA3542_ref            | Biofilm                      |
| algA      | PA3551_ref            | Biofilm                      |
| algB      | PA5483_ref            | Biofilm                      |
| algD      | PA3540_ref            | Biofilm                      |
| algE      | PA3544_ref            | Biofilm                      |
| algF      | PA3550_ref            | Biofilm                      |
| algG      | PA3545_ref            | Biofilm                      |
| algI      | PA3548_ref            | Biofilm                      |
| algJ      | PA3549_ref            | Biofilm                      |
| algK      | PA3543_ref            | Biofilm                      |
| algL      | PA3547_ref            | Biofilm                      |
| algR      | PA5261_ref            | Biofilm                      |
| algX      | PA3546_ref            | Biofilm                      |
| cdrA      | PA4625_ref            | Biofilm                      |
| flgB      | PA1077_ref            | Biofilm                      |
| flgC      | PA1078_ref            | Biofilm                      |
| flgE      | PA1080_ref            | Biofilm                      |
| flgF      | PA1081_ref            | Biofilm                      |
| flgG      | PA1082_ref            | Biofilm                      |
| flgH      | PA1083_ref            | Biofilm                      |
| flgI      | PA1084_ref            | Biofilm                      |
| flgK      | PA1086_ref            | Biofilm                      |
| flgL      | PA1087_ref            | Biofilm                      |
| flhA      | PA1452_ref            | Biofilm                      |
| flhB      | PA1449_ref            | Biofilm                      |
| fliC      | PA1092_ref            | Biofilm                      |
| fliF      | PA1101_ref            | Biofilm                      |
| fliG      | PA1102_ref            | Biofilm                      |
| fliM      | PA1443_ref            | Biofilm                      |
| fliN      | PA1444_ref            | Biofilm                      |
| fliO      | PA1445_ref            | Biofilm                      |
| fliP      | PA1446_ref            | Biofilm                      |
| fliQ      | PA1447_ref            | Biofilm                      |
| fliR      | PA1448_ref            | Biofilm                      |
| motA      | PA4954_ref            | Biofilm                      |
| motB      | PA4953_ref            | Biofilm                      |

|      |            |              |
|------|------------|--------------|
| mucA | PA0763_ref | biofilm      |
| pelA | PA3064_ref | Biofilm      |
| pelB | PA3063_ref | Biofilm      |
| pelC | PA3062_ref | Biofilm      |
| pelD | PA3061_ref | Biofilm      |
| pelE | PA3060_ref | Biofilm      |
| psIA | PA2231_ref | Biofilm      |
| psIB | PA2232_ref | Biofilm      |
| psIC | PA2233_ref | Biofilm      |
| psID | PA2234_ref | Biofilm      |
| psIE | PA2235_ref | Biofilm      |
| psIF | PA2236_ref | Biofilm      |
| psIG | PA2237_ref | Biofilm      |
| psIH | PA2238_ref | Biofilm      |
| psII | PA2239_ref | Biofilm      |
| psIJ | PA2240_ref | Biofilm      |
| psIK | PA2241_ref | Biofilm      |
| psIL | PA2242_ref | Biofilm      |
| psIM | PA2243_ref | Biofilm      |
| psIN | PA2244_ref | Biofilm      |
| psIO | PA2245_ref | Biofilm      |
| dnaE | PA3640_ref | Housekeeping |
| gacA | PA2586_ref | Housekeeping |
| gyrB | PA0004_ref | Housekeeping |
| mreB | PA4481_ref | Housekeeping |
| mutS | PA3620_ref | Housekeeping |
| ppsA | PA1770_ref | Housekeeping |
| recA | PA3617_ref | Housekeeping |
| rpoB | PA4270_ref | Housekeeping |
| rpoD | PA0576_ref | Housekeeping |
| algZ | PA3385_ref | Twitching    |
| chpA | PA0413_ref | Twitching    |
| pilA | PA4525_ref | Twitching    |
| pilB | PA4526_ref | Twitching    |
| pilE | PA4556_ref | Twitching    |
| pilI | PA0410_ref | Twitching    |
| pilJ | PA0411_ref | Twitching    |
| pilR | PA4547_ref | Twitching    |
| pilS | PA4546_ref | Twitching    |
| pilT | PA0395_ref | Twitching    |

|             |            |                        |
|-------------|------------|------------------------|
| pilU        | PA0396_ref | Twitching              |
| phzA1       | PA4210_ref | Pyocyanin Biosynthesis |
| phzA2       | PA1899_ref | Pyocyanin Biosynthesis |
| phzB1       | PA4211_ref | Pyocyanin Biosynthesis |
| phzB2       | PA1900_ref | Pyocyanin Biosynthesis |
| phzC1       | PA4212_ref | Pyocyanin Biosynthesis |
| phzC2       | PA1901_ref | Pyocyanin Biosynthesis |
| phzD1       | PA4213_ref | Pyocyanin Biosynthesis |
| phzD2       | PA1902_ref | Pyocyanin Biosynthesis |
| phzE1       | PA4214_ref | Pyocyanin Biosynthesis |
| phzE2       | PA1903_ref | Pyocyanin Biosynthesis |
| phzF1       | PA4215_ref | Pyocyanin Biosynthesis |
| phzF2       | PA1904_ref | Pyocyanin Biosynthesis |
| phzG1       | PA4216_ref | Pyocyanin Biosynthesis |
| phzG2       | PA1905_ref | Pyocyanin Biosynthesis |
| phzM        | PA4209_ref | Pyocyanin Biosynthesis |
| phzS        | PA4217_ref | Pyocyanin Biosynthesis |
| FpvA        | PA2398_ref | Pyocyanin Biosynthesis |
| FpvB        | PA4168_ref | Pyocyanin Biosynthesis |
| PpyR        | PA2663_ref | Pyocyanin Biosynthesis |
| PvdD        | PA2399_ref | Pyocyanin Biosynthesis |
| PvdE        | PA2397_ref | Pyocyanin Biosynthesis |
| PvdF        | PA2396_ref | Pyocyanin Biosynthesis |
| gacS        | PA0928_ref | Quorum Sensing         |
| guaA        | PA3769_ref | Quorum Sensing         |
| lasI        | PA1432_ref | Quorum Sensing         |
| lasR        | PA1430_ref | Quorum Sensing         |
| phnA        | PA1001_ref | Quorum Sensing         |
| phnB        | PA1002_ref | Quorum Sensing         |
| pqsA        | PA0996_ref | Quorum Sensing         |
| pqsB        | PA0997_ref | Quorum Sensing         |
| pqsC        | PA0998_ref | Quorum Sensing         |
| pqsD        | PA0999_ref | Quorum Sensing         |
| pqsE        | PA1000_ref | Quorum Sensing         |
| pqsH        | PA2587_ref | Quorum Sensing         |
| pqsR (mvfR) | PA1003_ref | Quorum Sensing         |
| rhII        | PA3476_ref | Quorum Sensing         |
| rhIR        | PA3477_ref | Quorum Sensing         |
| rsaL        | PA1431_ref | Quorum Sensing         |
| vfr         | PA0652_ref | Quorum Sensing         |
